# Supplementary material
Source: MDPI journal article supplement (https://www.mdpi.com/2073-4433/14/2/348)
Supplement: s1 [file s1]

# Supplementary Materials: High spatial resolution emission inventory of air pollutants and carbon in China's independent coking industry

Xiaochun Chen<sup>1</sup>, Jianhui Li<sup>1,2</sup>, Min Jia<sup>3</sup>, Shaobo Chen<sup>1,2</sup>, Shangxuan Zhang<sup>4</sup>, Xin Bo<sup>1,2,\*</sup>, Xue Feng<sup>5</sup> and Guangxia Dong<sup>5</sup>

<sup>1</sup> College of Chemical Engineering, Beijing University of Chemical Technology, Beijing 100029, China

<sup>2</sup> BUCT Institute for Carbon-neutrality of Chinese Industries, Beijing 100029, China

<sup>3</sup> School of Economics and Management, Beihang University, Beijing 100191, China

<sup>4</sup> CISDI Engineering Co., Ltd, Chongqing 400013, China

<sup>5</sup> China National Environmental Monitoring Centre, Beijing 100012, China

\* Correspondence: boxin@buct.edu.cn

**Section S1:** The relationship between the production of coke and GDP.

**Table S1.** Emission concentration and theoretical flue gas rate for coking.

**Table S2.** Emission factors based on coking industry emission standards (unit: kg/t).

**Table S3.** Emission factors of coke oven chimney based on CEMS in 2015 and 2018 (unit: kg/t)

**Table S4.** Proportion of PM<sub>2.5</sub> in PM<sub>10</sub> (%).

**Table S5.** Emission factors for other pollutants.

**Table S6.** Emission concentration and emission factors for coking under the ULE index.

**Figure S1.** Distribution and scale of production of China's independent coking industry in 2012(a) and 2015(b).

**Figure S2.** Spatial distributions of PM<sub>2.5</sub>(a), SO<sub>2</sub>(b), and NO<sub>x</sub>(c) emissions of China's independent coking industry in 2012.

**Figure S3.** Spatial distributions of PM<sub>2.5</sub>(a), SO<sub>2</sub>(b), and NO<sub>x</sub>(c) emissions of China's independent coking industry in 2015.

**Figure S4.** Provincial production of coke and emissions of SO<sub>2</sub>, NO<sub>x</sub>, and PM<sub>2.5</sub> of China's independent coking industry in 2012.

**Figure S5.** Provincial production of coke and emissions of SO<sub>2</sub>, NO<sub>x</sub>, and PM<sub>2.5</sub> of China's independent coking industry in 2015.

**Figure S6.** The prediction of GDP.

**Figure S7.** The relationship between production of coke and GDP.

**Section S1:** The relationship between the production of coke and GDP.

According to our estimates, the GDP of China can be accurately predicted by Linear fitting method in Figure S6. We found that the natural logarithm of GDP is a strong linear predictor of the natural logarithm of production of coke. According to the GDP values of several years and the investigated data of the renewal production of coke in independent coking industry, this paper predicted the production of coke in independent coking industry in the next decades (Figure S7).

**Table S1.** Emission concentration and theoretical flue gas rate for coking.

| Emission source   | level  | Scale Structure        | Concentration (GB 16171-2012) (mg/Nm <sup>3</sup> ) |                 |                  | Concentration (GB 16171-1996) (mg/Nm <sup>3</sup> ) |                 |                  | Theoretical flue gas rate (Nm <sup>3</sup> /t) |
|-------------------|--------|------------------------|-----------------------------------------------------|-----------------|------------------|-----------------------------------------------------|-----------------|------------------|------------------------------------------------|
|                   |        |                        | SO <sub>2</sub>                                     | NO <sub>x</sub> | PM <sub>10</sub> | SO <sub>2</sub>                                     | NO <sub>x</sub> | PM <sub>10</sub> |                                                |
| Coal preparation  | First  | ≥ 100,000 t/a          | -                                                   | -               | 15               | -                                                   | -               | -                | 604                                            |
|                   | Second | 60,000 t/a-100,000 t/a | -                                                   | -               | 30               | -                                                   | -               | 300              | 601                                            |
|                   | Third  | < 60,000 t/a           | -                                                   | -               | 50               | -                                                   | -               | -                | 596.4                                          |
| Coal charging     | First  | ≥ 100,000 t/a          | 70                                                  | -               | 30               | -                                                   | -               | -                | 556.67                                         |
|                   | Second | 60,000 t/a-100,000 t/a | 100                                                 | -               | 50               | 500                                                 | -               | 300              | 522                                            |
|                   | Third  | < 60,000 t/a           | 150                                                 | -               | 100              | -                                                   | -               | -                | 525.9                                          |
| Pushing           | First  | ≥ 100,000 t/a          | 30                                                  | -               | 30               | -                                                   | -               | -                | 1670.33                                        |
|                   | Second | 60,000 t/a-100,000 t/a | 50                                                  | -               | 50               | 500                                                 | -               | 300              | 1624                                           |
|                   | Third  | < 60,000 t/a           | 100                                                 | -               | 100              | -                                                   | -               | -                | 1624.1                                         |
| Coke oven chimney | First  | ≥ 100,000 t/a          | 200                                                 | 500             | 15               | -                                                   | -               | -                | 1471.33                                        |
|                   | Second | 60,000 t/a-100,000 t/a | 200                                                 | 500             | 15               | 500                                                 | -               | 300              | 1548.67                                        |
|                   | Third  | < 60,000 t/a           | 200                                                 | 500             | 15               | -                                                   | -               | -                | 1548.67                                        |
| Quenching         | First  | ≥ 100t/a               | 100                                                 | -               | 50               | -                                                   | -               | -                | 928                                            |
|                   | Second | 60,000 t/a-100,000 t/a | 100                                                 | -               | 50               | 500                                                 | -               | 300              | 928                                            |
|                   | Third  | < 60,000 t/a           | 100                                                 | -               | 50               | -                                                   | -               | -                | 928                                            |

Note: Nm<sup>3</sup> represents the volume of gas at 273.15 K and 1 standard atmosphere.

**Table S2.** Emission factors based on coking industry emission standards (unit: kg/t).

| Emission source   | level  | Scale Structure           | SO <sub>2</sub> |       | NO <sub>x</sub> |       | PM <sub>10</sub> |       |
|-------------------|--------|---------------------------|-----------------|-------|-----------------|-------|------------------|-------|
|                   |        |                           | 2012            | 1996  | 2012            | 1996  | 2012             | 1996  |
| Coal preparation  | First  | ≥ 100,0000 t/a            | -               | -     | -               | -     | 0.009            | -     |
|                   | Second | 60,0000 t/a- 100,0000 t/a | -               | -     | -               | -     | 0.018            | 0.179 |
|                   | Third  | < 60,0000 t/a             | -               | -     | -               | -     | 0.030            | -     |
| Coal charging     | First  | ≥100,0000 t/a             | 0.039           | -     | -               | -     | 0.017            | -     |
|                   | Second | 60,0000 t/a- 100,0000 t/a | 0.052           | 0.263 | -               | -     | 0.026            | 0.158 |
|                   | Third  | < 60,0000 t/a             | 0.079           | -     | -               | -     | 0.053            | -     |
| Pushing           | First  | ≥100,0000 t/a             | 0.050           | -     | -               | -     | 0.050            | -     |
|                   | Second | 60,0000 t/a- 100,0000 t/a | 0.081           | 0.812 | -               | -     | 0.081            | 0.487 |
|                   | Third  | < 60,0000 t/a             | 0.162           | -     | -               | -     | 0.162            | -     |
| Coke oven chimney | First  | ≥100,0000 t/a             | 0.294           | -     | 0.736           | -     | 0.022            | -     |
|                   | Second | 60,0000 t/a- 100,0000 t/a | 1.549           | 1.549 | 0.774           | 0.774 | 0.023            | 0.465 |
|                   | Third  | < 60,0000 t/a             | 1.549           | -     | 0.774           | -     | 0.023            | -     |
| Quenching         | First  | ≥ 100t/a                  | 0.093           | -     | -               | -     | 0.046            | -     |
|                   | Second | 60,0000 t/a- 100,0000 t/a | 0.093           | 0.464 | -               | -     | 0.046            | 0.278 |
|                   | Third  | < 60,0000 t/a             | 0.093           | -     | -               | -     | 0.046            | -     |

**Table S3.** Emission factors of coke oven chimney based on CEMS in 2015 and 2018 (unit:kg/t).

| Province | PM <sub>10</sub> | 2015             |                 |                 | 2018             |                 |                 |
|----------|------------------|------------------|-----------------|-----------------|------------------|-----------------|-----------------|
|          |                  | PM <sub>10</sub> | SO <sub>2</sub> | NO <sub>x</sub> | PM <sub>10</sub> | SO <sub>2</sub> | NO <sub>x</sub> |
| AH       | 0.034            | 0.134            | 0.596           | 0.018           | 0.036            | 0.319           |                 |
| FJ       | 0.034            | 0.134            | 0.596           | 0.018           | 0.036            | 0.319           |                 |
| GS       | 0.029            | 0.045            | 0.596           | 0.012           | 0.055            | 0.027           |                 |
| GD       | 0.034            | 0.134            | 0.596           | 0.004           | 0.014            | 0.162           |                 |
| GX       | 0.034            | 0.134            | 0.596           | 0.011           | 0.072            | 0.404           |                 |
| GZ       | 0.034            | 0.134            | 0.596           | 0.018           | 0.036            | 0.319           |                 |
| HE       | 0.031            | 0.067            | 0.632           | 0.012           | 0.021            | 0.225           |                 |
| HA       | 0.031            | 0.104            | 0.681           | 0.014           | 0.009            | 0.14            |                 |
| HL       | 0.034            | 0.134            | 0.596           | 0.018           | 0.036            | 0.319           |                 |
| HB       | 0.034            | 0.134            | 0.596           | 0.018           | 0.036            | 0.319           |                 |
| HN       | 0.034            | 0.134            | 0.596           | 0.009           | 0.015            | 0.025           |                 |
| JL       | 0.034            | 0.134            | 0.596           | 0.023           | 0.029            | 0.479           |                 |
| JS       | 0.034            | 0.134            | 0.596           | 0.014           | 0.028            | 0.328           |                 |
| JX       | 0.047            | 0.352            | 0.589           | 0.016           | 0.043            | 0.318           |                 |
| LN       | 0.034            | 0.134            | 0.596           | 0.027           | 0.033            | 0.335           |                 |
| NM       | 0.028            | 0.061            | 0.628           | 0.022           | 0.048            | 0.518           |                 |
| NX       | 0.034            | 0.134            | 0.596           | 0.018           | 0.036            | 0.319           |                 |
| QH       | 0.034            | 0.134            | 0.596           | 0.018           | 0.036            | 0.319           |                 |

|       |       |       |       |       |       |       |
|-------|-------|-------|-------|-------|-------|-------|
| SD    | 0.034 | 0.134 | 0.596 | 0.02  | 0.041 | 0.445 |
| SX    | 0.034 | 0.11  | 0.501 | 0.02  | 0.042 | 0.295 |
| SN    | 0.034 | 0.134 | 0.596 | 0.018 | 0.036 | 0.319 |
| SH    | 0.034 | 0.134 | 0.596 | 0.018 | 0.036 | 0.319 |
| SC    | 0.034 | 0.134 | 0.596 | 0.036 | 0.079 | 0.355 |
| TJ    | 0.034 | 0.134 | 0.596 | 0.018 | 0.036 | 0.319 |
| XJ    | 0.034 | 0.134 | 0.596 | 0.026 | 0.077 | 0.724 |
| YN    | 0.034 | 0.134 | 0.596 | 0.018 | 0.036 | 0.319 |
| ZJ    | 0.034 | 0.134 | 0.596 | 0.019 | 0.044 | 0.515 |
| CQ    | 0.043 | 0.296 | 0.565 | 0.018 | 0.036 | 0.319 |
| TOTAL | 0.034 | 0.134 | 0.596 | 0.018 | 0.036 | 0.319 |

**Table S4.** Proportion of PM<sub>2.5</sub> in PM<sub>10</sub> (%).

| Quenching          | Coal preparation   | Coal charging and pushing | Coke oven chimney  |
|--------------------|--------------------|---------------------------|--------------------|
| 30.46 <sup>1</sup> | 37.78 <sup>1</sup> | 40.97 <sup>1</sup>        | 40.97 <sup>1</sup> |

<sup>1</sup>(Zhang, 2015).**Table S5.** Emission factors for other pollutants.

| Pollutants      | VOCs (kg/t)       | CO (kg/t)        | BC (%)          | OC (%)          |
|-----------------|-------------------|------------------|-----------------|-----------------|
| Emission factor | 2.96 <sup>2</sup> | 1.6 <sup>2</sup> | 30 <sup>3</sup> | 35 <sup>3</sup> |

<sup>2</sup>(He, 2017) <sup>3</sup>(Lei, 2008).**Table S6.** Emission concentration and emission factors for coking under the ULE index.

| Emission source   | Concentration (mg/Nm <sup>3</sup> ) |                 |                  | Emission factors (kg/t) |                 |                  |
|-------------------|-------------------------------------|-----------------|------------------|-------------------------|-----------------|------------------|
|                   | SO <sub>2</sub>                     | NO <sub>x</sub> | PM <sub>10</sub> | SO <sub>2</sub>         | NO <sub>x</sub> | PM <sub>10</sub> |
| Coal preparation  | 0.000                               | 0.000           | 10.000           | 0.000                   | 0.000           | 0.006            |
| Coal charging     | 0.000                               | 0.000           | 10.000           | 0.000                   | 0.000           | 0.005            |
| Pushing           | 0.000                               | 0.000           | 10.000           | 0.000                   | 0.000           | 0.016            |
| Coke oven chimney | 30.000                              | 150.000         | 10.000           | 0.046                   | 0.232           | 0.015            |
| Quenching         | 50.000                              | 0.000           | 10.000           | 0.046                   | 0.000           | 0.009            |

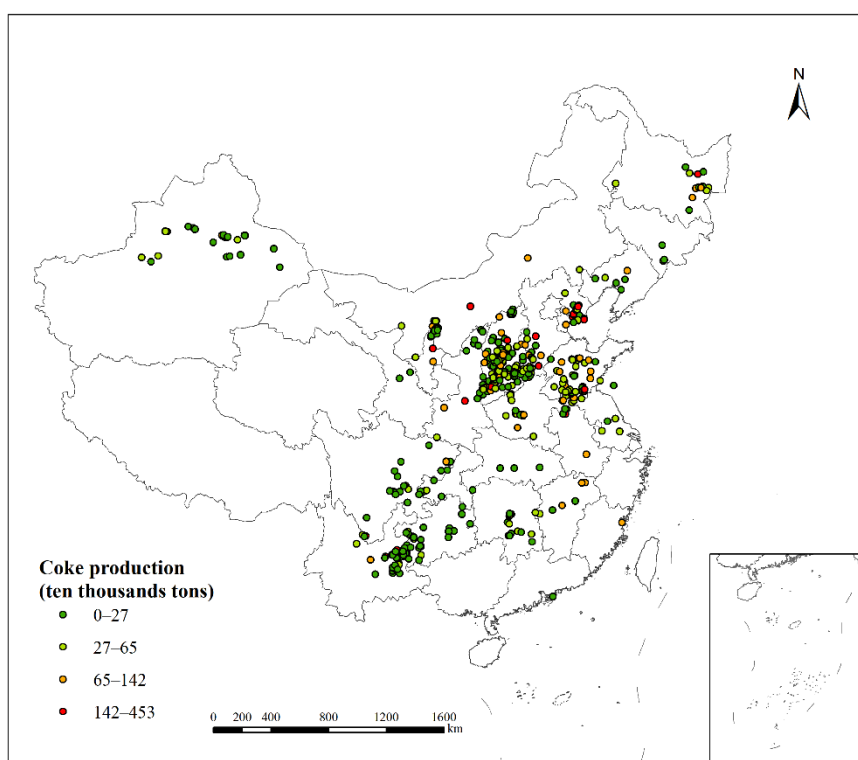

(a) 2012

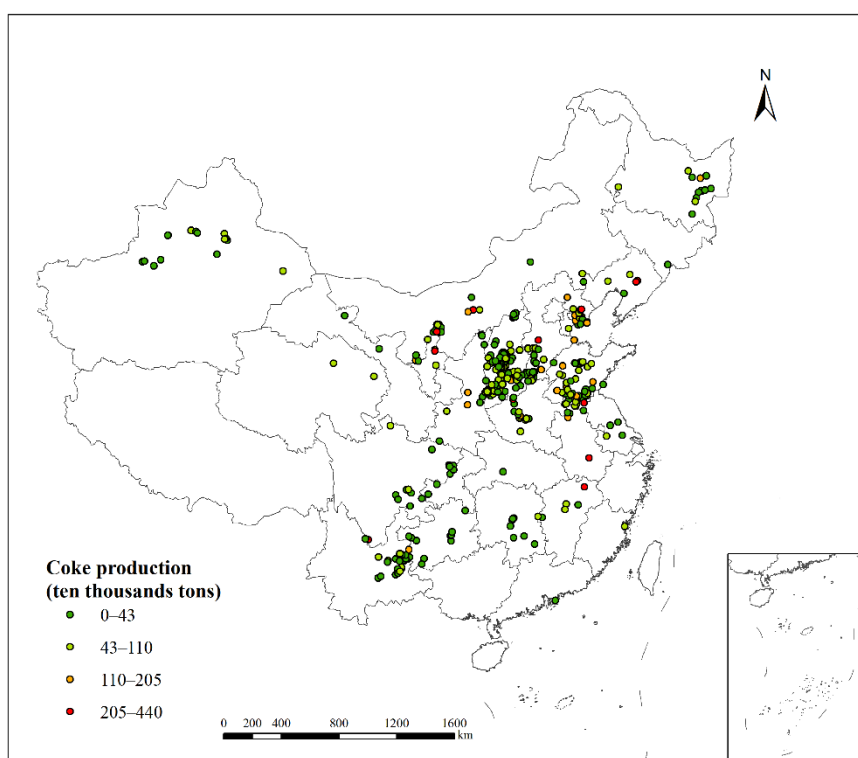

(b) 2015

**Figure S1.** Distribution and scale of production of China's independent coking industry in 2012(a) and 2015(b).

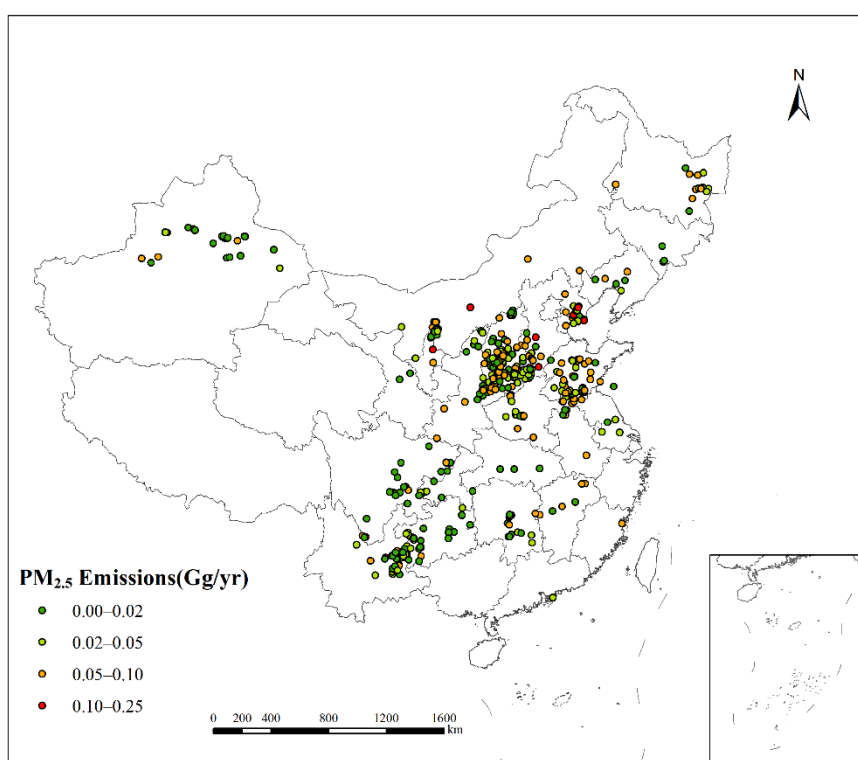(a) PM<sub>2.5</sub> Emissions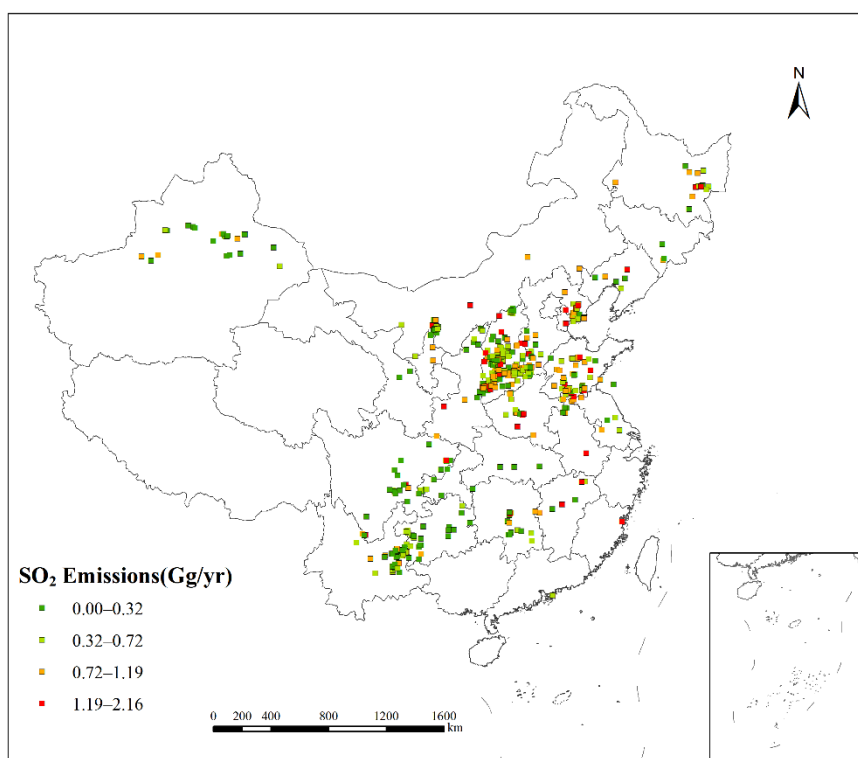(b) SO<sub>2</sub> Emissions

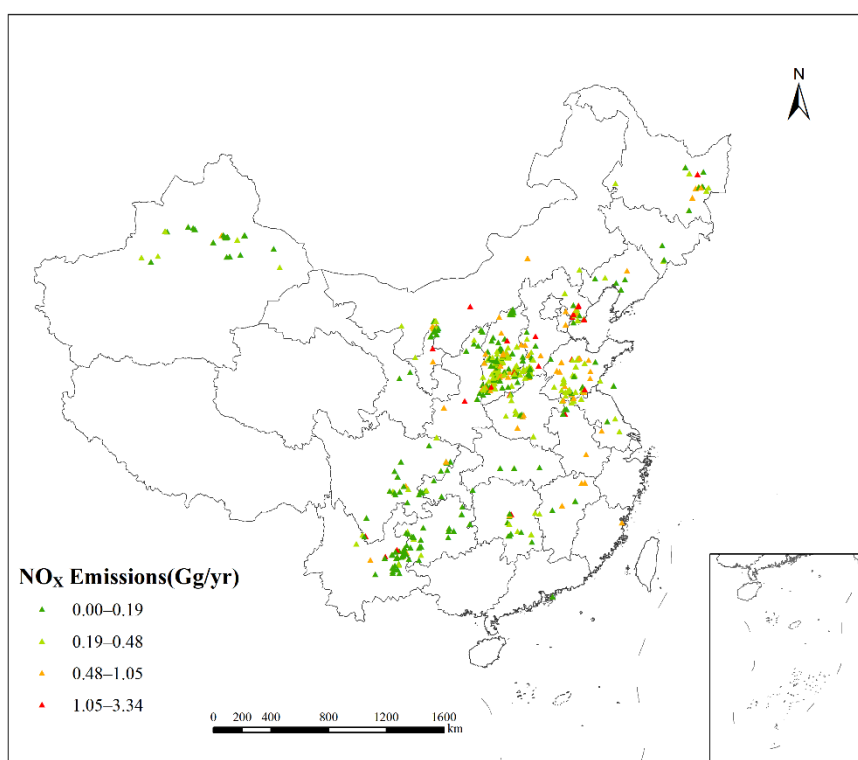(c) NO<sub>x</sub> Emissions

**Figure S2.** Spatial distributions of PM<sub>2.5</sub>(a), SO<sub>2</sub>(b), and NO<sub>x</sub>(c) emissions of China's independent coking industry in 2012.

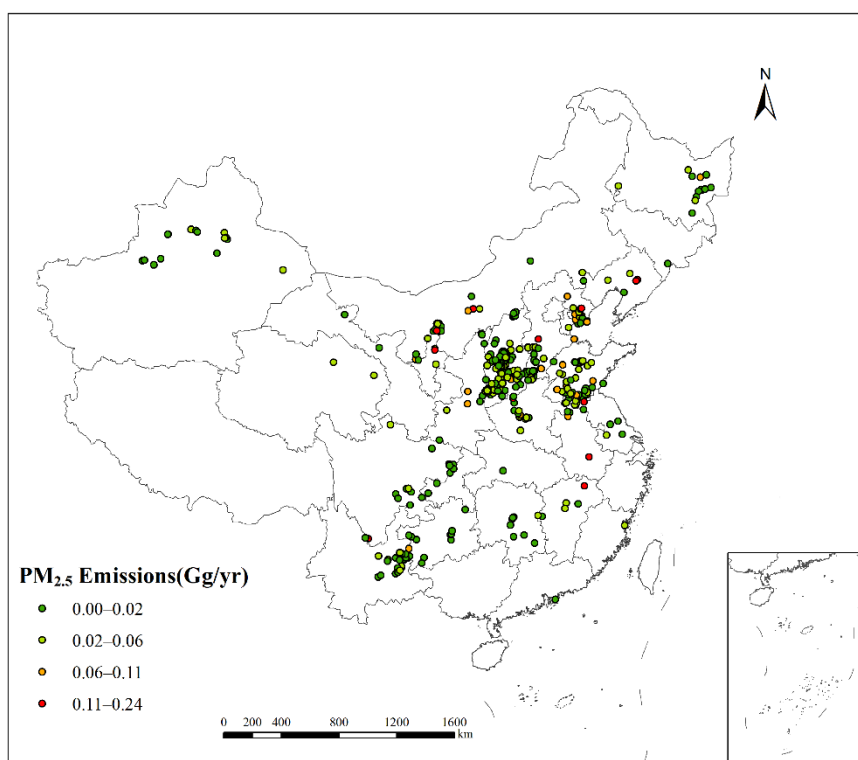(a) PM<sub>2.5</sub> Emissions

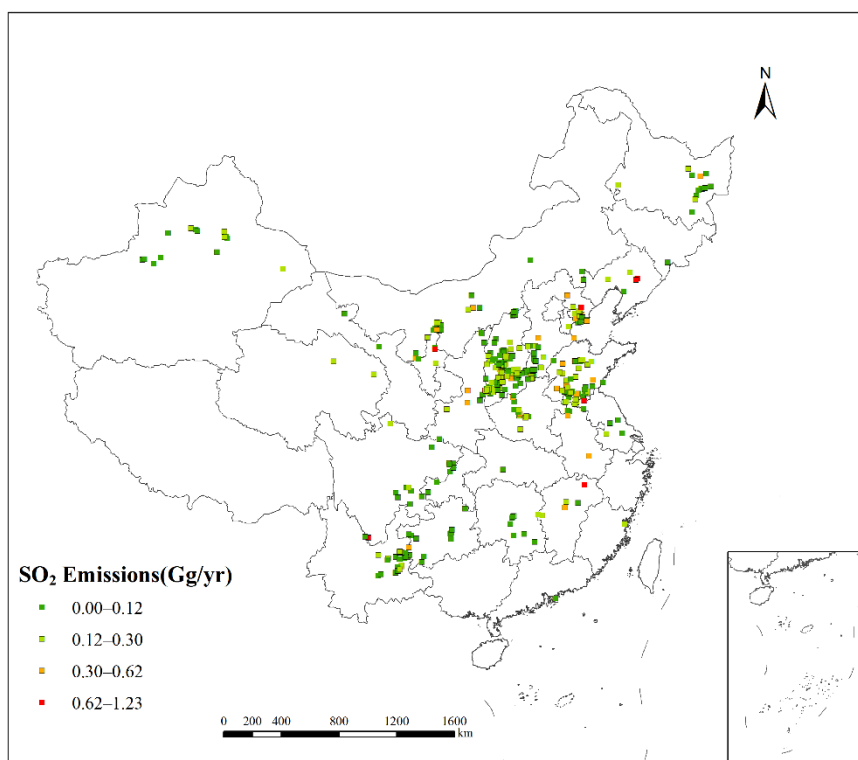(b) SO<sub>2</sub> Emissions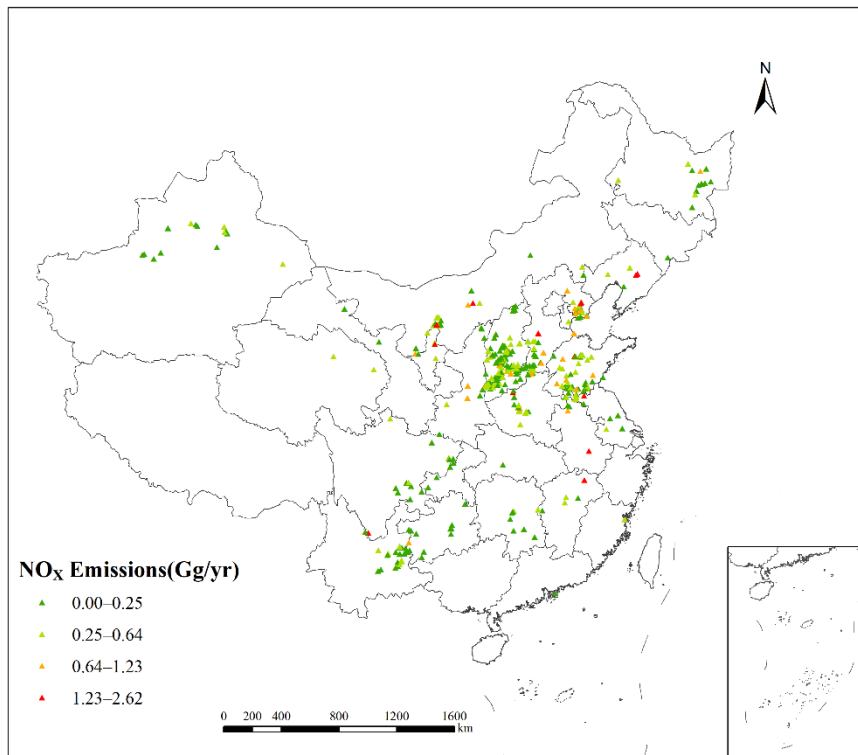(c) NO<sub>x</sub> Emissions

**Figure S3.** Spatial distributions of PM<sub>2.5</sub>(a), SO<sub>2</sub>(b), and NO<sub>x</sub>(c) emissions of China's independent coking industry in 2015.



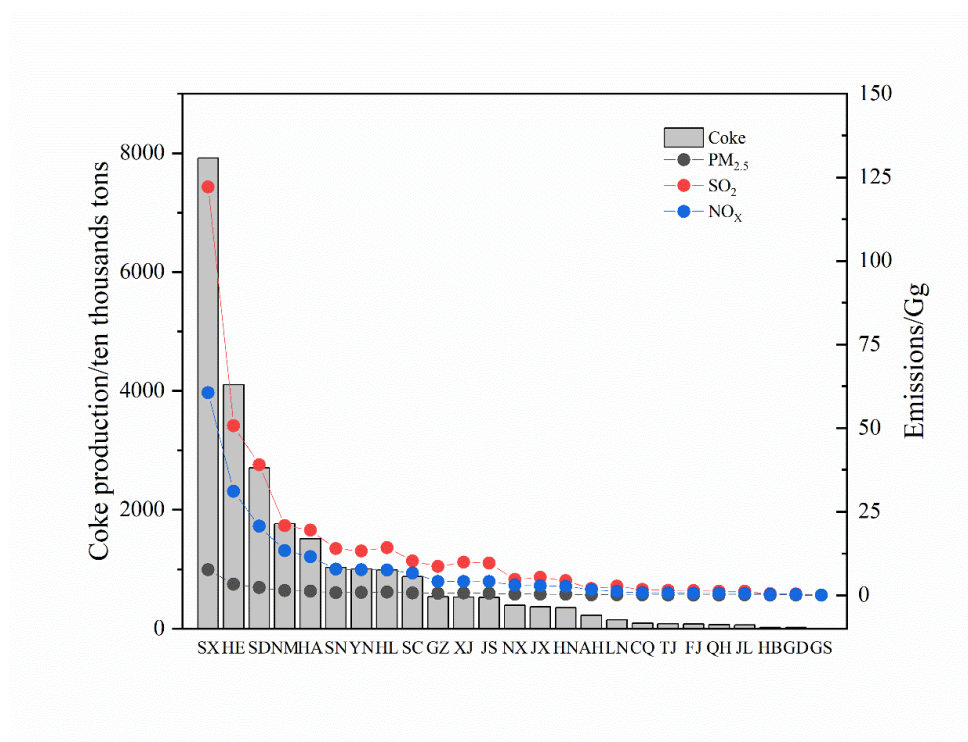

**Figure S4.** Provincial production of coke and emissions of  $\text{SO}_2$ ,  $\text{NO}_x$ , and  $\text{PM}_{2.5}$  of China's independent coking industry in 2012.

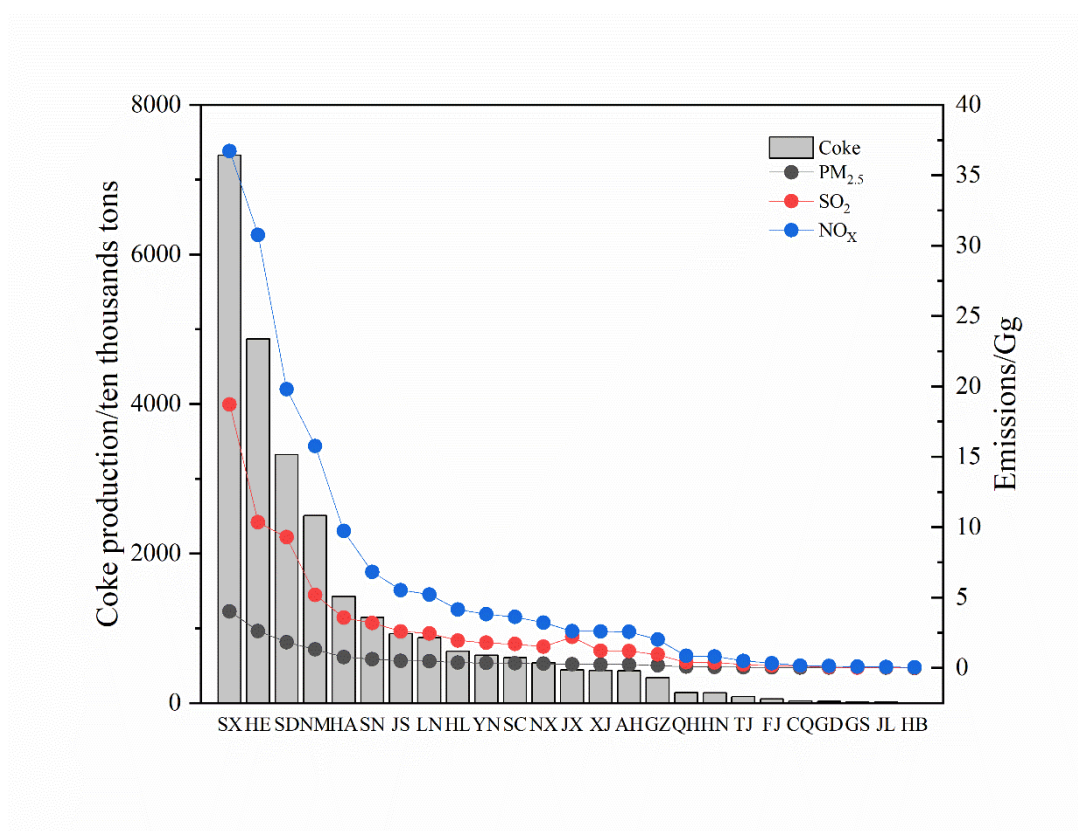

**Figure S5.** Provincial production of coke and emissions of  $\text{SO}_2$ ,  $\text{NO}_x$ , and  $\text{PM}_{2.5}$  of China's independent coking industry in 2015.

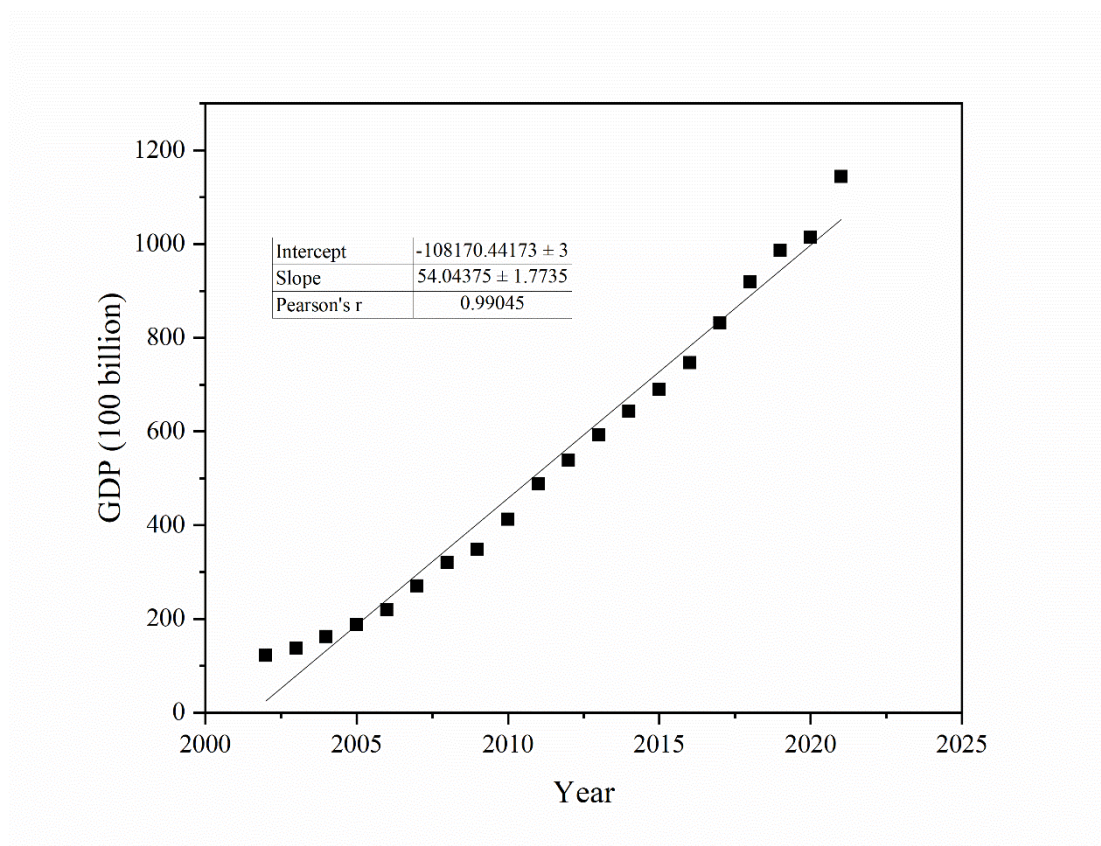

Figure S6. The prediction of GDP.

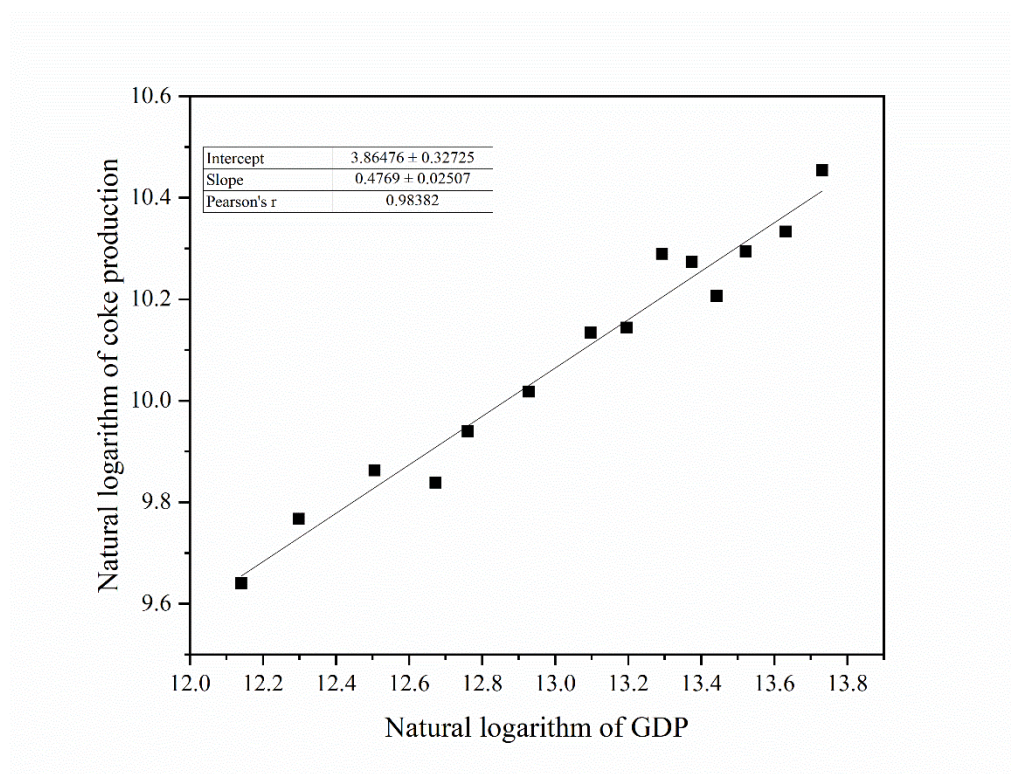

Figure S7. The relationship between production of coke and GDP.

## References

1. He K, 2017. Technical Manual for the Preparation of Urban Air Pollutant Emission Inventory 2017. Tsinghua University, Beijing (in Chinese).
2. Lei Y, 2008. Research on Anthropogenic Emissions and Control of Primary Particles and its Key Chemical Components. Tsinghua University, Beijing, China. (in Chinese).
3. Zhang G, 2015. Emission Characteristics of Particulate Matter of Steel Plants. Northeastern University, Liaoning, China. (in Chinese).
